# Supplementary material
Source: PubMed Central journal article supplement (PMC3094116)
Supplement: emboj201138s1.pdf [file emboj201138s1.pdf]

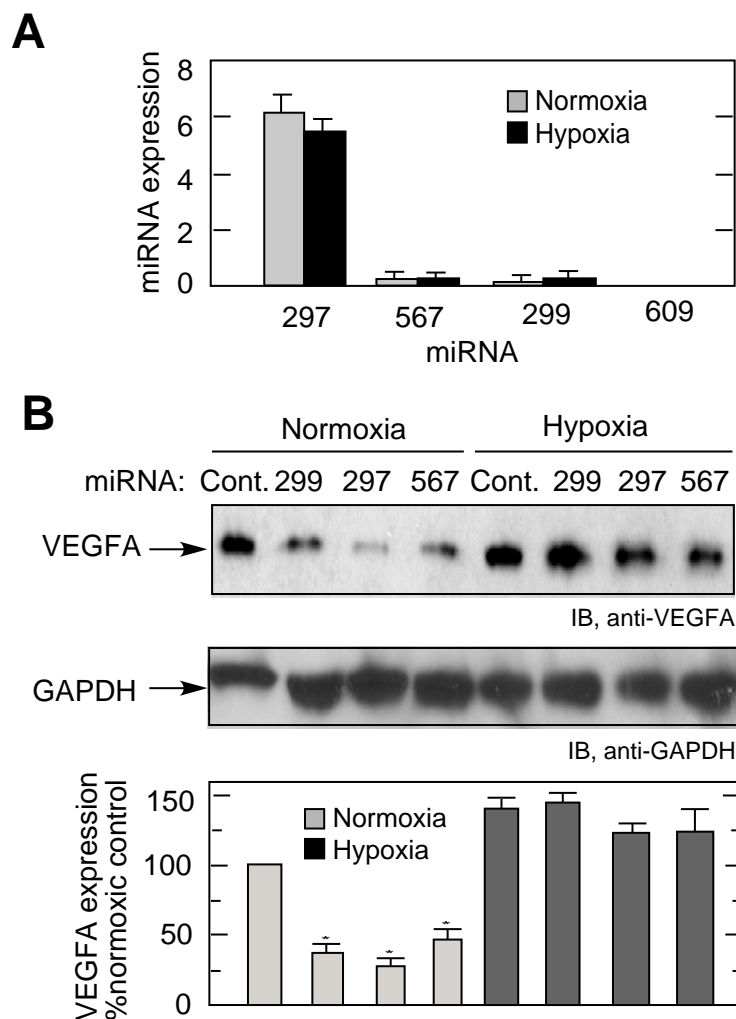

**Figure S1** Effect of CARE-binding miRNAs on VEGFA expression in HEK293T cells. **(A)** Endogenous expression of CARE-binding miRNAs in HEK293T cells. Cells were incubated under conditions of normoxia or hypoxia for 24 hr before isolation of total small RNAs. Specific miRNA levels were determined by quantitative real time RT-PCR using miR-17-5p as normalizer. **(B)** Hypoxia prevents miRNA-mediated inhibition of VEGFA expression in HEK293T cells. Cells were incubated with miRNAs under normoxic or hypoxic conditions for 24 hr. Cell lysates were subjected to immunoblot analysis with anti-VEGFA (top) and anti-GAPDH (middle) antibodies. VEGFA was expressed as % of normoxic control (bottom). Results are expressed as mean  $\pm$  s.d. for  $n = 3$  independent experiments. An asterisk (\*) indicates a significant difference,  $P < 0.05$ , two-tailed t-test.
